# Supplementary material for: Enhanced Lycopene Extraction from Tomato Peels by Optimized Mixed-Polarity Solvent Mixtures
Source: PubMed Central journal article supplement (PMC7248986; doi:10.3390/molecules25092038), 2020-04-27
Supplement: molecules-25-02038-s001.pdf [file molecules-25-02038-s001.pdf]

# **Enhanced Lycopene Extraction from Tomato Peels by Optimized Mixed-Polarity Solvent Mixtures**

Antonio Zuorro

**Supplementary Material**

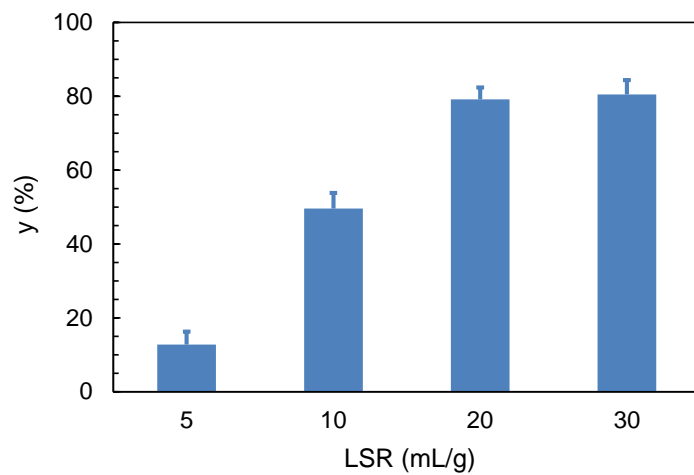

**Figure S1.** Effect of liquid-to-solid ration (LSR) on lycopene extraction yield (y).

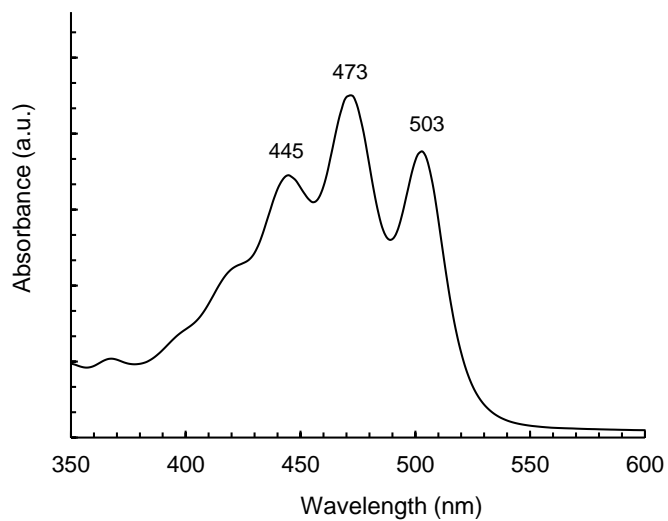

**Figure S2.** Absorption spectrum of lycopene in the visible region, with its three characteristic peaks.

**Table S1.** Estimated model coefficients at 10, 25 and 40 °C for the ternary system *n*-hexane(1)–ethanol(2)–acetone(3). SE is the standard error and VIF the variance inflation factor associated at each model coefficient.

|                         | T = 10 °C |        |      | T = 25 °C |        |      | T = 40 °C |        |      |
|-------------------------|-----------|--------|------|-----------|--------|------|-----------|--------|------|
|                         | Value     | SE     | VIF  | Value     | SE     | VIF  | Value     | SE     | VIF  |
| <i>a</i> <sub>1</sub>   | 3.16      | 2.79   | 1.77 | 4.01      | 5.43   | 1.77 | 8.74      | 3.19   | 1.77 |
| <i>a</i> <sub>2</sub>   | 2.37      | 2.79   | 1.77 | 2.00      | 5.43   | 1.77 | 13.81     | 3.19   | 1.77 |
| <i>a</i> <sub>3</sub>   | 36.81     | 2.79   | 1.77 | 63.74     | 5.43   | 1.77 | 81.13     | 3.19   | 1.77 |
| <i>a</i> <sub>12</sub>  | 47.29     | 15.81  | 2.21 | 130.33    | 30.77  | 2.21 | 225.67    | 18.11  | 2.21 |
| <i>a</i> <sub>13</sub>  | 23.23     | 15.81  | 2.21 | 69.39     | 30.77  | 2.21 | 44.69     | 18.11  | 2.21 |
| <i>a</i> <sub>23</sub>  | 18.74     | 15.81  | 2.21 | 24.79     | 30.77  | 2.21 | 83.17     | 18.11  | 2.21 |
| <i>a</i> <sub>123</sub> | 537.79    | 102.77 | 2.36 | 785.12    | 200.05 | 2.36 | 654.00    | 117.74 | 2.36 |

**Table S2.** Estimated model coefficients at 10, 25 and 40 °C for the ternary system ethyl lactate(1)–ethanol(2)–acetone(3). SE is the standard error and VIF the variance inflation factor associated at each model coefficient.

|                         | T = 10 °C |       |      | T = 25 °C |       |      | T = 40 °C |        |      |
|-------------------------|-----------|-------|------|-----------|-------|------|-----------|--------|------|
|                         | Value     | SE    | VIF  | Value     | SE    | VIF  | Value     | SE     | VIF  |
| <i>a</i> <sub>1</sub>   | 6.88      | 1.24  | 1.77 | 18.51     | 2.33  | 1.91 | 44.01     | 4.66   | 1.77 |
| <i>a</i> <sub>2</sub>   | 3.62      | 1.24  | 1.77 | 5.45      | 2.33  | 1.91 | 14.58     | 4.66   | 1.77 |
| <i>a</i> <sub>3</sub>   | 35.67     | 1.24  | 1.77 | 61.64     | 2.33  | 1.91 | 78.96     | 4.66   | 1.77 |
| <i>a</i> <sub>12</sub>  | -2.96     | 7.04  | 2.21 | -11.35    | 12.71 | 2.21 | 0.65      | 26.40  | 2.21 |
| <i>a</i> <sub>13</sub>  | 2.54      | 7.04  | 2.21 | 32.76     | 12.71 | 2.21 | -27.73    | 26.40  | 2.21 |
| <i>a</i> <sub>23</sub>  | 17.76     | 7.04  | 2.21 | 21.88     | 12.71 | 2.21 | 78.18     | 26.40  | 2.21 |
| <i>a</i> <sub>123</sub> | -312.03   | 45.76 | 2.36 | -379.22   | 82.63 | 2.36 | -796.43   | 171.65 | 2.36 |
